# Supplementary material for: The visual ecology of Holocentridae, a nocturnal coral reef fish family with a deep-sea-like multibank retina
Source: Oxford University Press journal article supplement (doi:10.1242/jeb.233098), 2020-01-01
Supplement: jeb233098supp.pdf [file jeb233098supp.pdf]

## Supplementary Information

**Table S1.** Primers used for probe template (length of at least 600 bases) design. RNA Polymerase promoter sequences (T7 resp. T3) were incorporated in primer sequences.

| Species           | Opsin         | Primer         | Sequence                                          |
|-------------------|---------------|----------------|---------------------------------------------------|
| <i>N. sammara</i> | <i>SWS2</i>   | SWS2_forward   | 5'-TAATACGACTCACTATAGGGATCACTCAGCCCGTTCTTGG-3'    |
|                   |               | SWS2_reverse   | 5'-AATTAACCCTCACTAAAGGGCTCAGATCGAAGGTCTGCCC-3'    |
|                   | <i>RH2A-1</i> | RH2A-1_forward | 5'-TAATACGACTCACTATAGGGAAACCTTCGATGTGGACTGAAT-3'  |
|                   |               | RH2A-1_reverse | 5'-AATTAACCCTCACTAAAGGGGACACCTGTCAGGGCATTCC-3'    |
|                   | <i>RH2A-2</i> | RH2A-2_forward | 5'-TAATACGACTCACTATAGGGTAACCCTCGATGTGGACTGAGC-3'  |
|                   |               | RH2A-2_reverse | 5'-AATTAACCCTCACTAAAGGGTTCATCATGGCAAACCTCCAACA-3' |
| <i>M. berndti</i> | <i>SWS2A</i>  | SWS2A_forward  | 5'-TAATACGACTCACTATAGGGCTCAGGACCACTTGGGGAAC-3'    |
|                   |               | SWS2A_reverse  | 5'-AATTAACCCTCACTAAAGGGGACTGGCTGATGACTCCTCG-3'    |
|                   | <i>RH2B</i>   | RH2B_forward   | 5'-TAATACGACTCACTATAGGGTGGTGGTCACAGCTCAGAAC-3'    |
|                   |               | RH2B_reverse   | 5'-AATTAACCCTCACTAAAGGGACCATGCCACCCATTCCAAT-3'    |

**Table S2.** Summary of the stereology parameters used for the ganglion cell and photoreceptor topography analyses. SL = standard length,  $\varnothing$  = diameter, DC = double cone, SC = single cone, CE = Schaeffer coefficient of error.

| <b>Ganglion cells</b> |       |            |                            |                                                     |                                           |       |
|-----------------------|-------|------------|----------------------------|-----------------------------------------------------|-------------------------------------------|-------|
| Species               | Indiv | SL<br>(cm) | Lens $\varnothing$<br>(mm) | Counting frame<br>( $\mu\text{m}$ x $\mu\text{m}$ ) | Grid<br>( $\mu\text{m}$ x $\mu\text{m}$ ) | CE    |
| <i>M. berndti</i>     | A     | 15.3       | 8.5                        | 200 x 200                                           | 1700 x 1700                               | 0.034 |
|                       | B     | 16.5       | 9.4                        | 200 x 200                                           | 1800 x 1800                               | 0.037 |
| <i>M. violacea</i>    | A     | 12         | 6.5                        | 150 x 150                                           | 1300 x 1300                               | 0.032 |
|                       | B     | 9.3        | 5.3                        | 150 x 150                                           | 1050 x 1050                               | 0.027 |
| <i>M. murdjan</i>     | A     | 15.7       | 8.8                        | 200 x 200                                           | 1700 x 1700                               | 0.035 |
| <i>M. pralinia</i>    | A     | 12.2       | 8.3                        | 200 x 200                                           | 1600 x 1600                               | 0.029 |
| <i>N. sammara</i>     | A     | 11.9       | 5.5                        | 130 x 130                                           | 1150 x 1150                               | 0.053 |
|                       | B     | 14.3       | 6.7                        | 130 x 130                                           | 1300 x 1300                               | 0.056 |
| <i>S. spiniferum</i>  | A     | 19.7       | 7.1                        | 150 x 150                                           | 1350 x 1350                               | 0.045 |
|                       | B     | 21.8       | 7.2                        | 150 x 150                                           | 1400 x 1400                               | 0.043 |
| <i>S. diadema</i>     | A     | 11.9       | 5.1                        | 120 x 120                                           | 940 x 940                                 | 0.044 |
|                       | B     | 11.7       | 5.0                        | 120 x 120                                           | 1000 x 1000                               | 0.048 |
| <i>S. rubrum</i>      | A     | 15.7       | 8.0                        | 150 x 150                                           | 1450 x 1450                               | 0.045 |
| <i>S. violaceum</i>   | A     | 15.6       | 6.6                        | 150 x 150                                           | 1250 x 1250                               | 0.041 |

  

| <b>Photoreceptors</b> |       |            |                                                        |                                                        |                                           |          |          |
|-----------------------|-------|------------|--------------------------------------------------------|--------------------------------------------------------|-------------------------------------------|----------|----------|
| Species               | Indiv | SL<br>(cm) | Counting frame<br>DC ( $\mu\text{m}$ x $\mu\text{m}$ ) | Counting frame<br>SC ( $\mu\text{m}$ x $\mu\text{m}$ ) | Grid<br>( $\mu\text{m}$ x $\mu\text{m}$ ) | CE<br>DC | CE<br>SC |
| <i>M. berndti</i>     | C     | 10.2       | 150 x 150                                              | 300 x 300                                              | 1160 x 1160                               | 0.030    | 0.037    |
| <i>M. violacea</i>    | B     | 9.3        | 150 x 150                                              | 300 x 300                                              | 1350 x 1350                               | 0.028    | 0.050    |
|                       | C     | 10.7       | 150 x 150                                              | 300 x 300                                              | 1250 x 1250                               | 0.033    | 0.050    |
| <i>M. murdjan</i>     | B     | 14.7       | 300 x 300                                              | 450 x 450                                              | 1400 x 1400                               | 0.035    | 0.057    |
|                       | C     | 18.1       | 300 x 300                                              | 300 x 300                                              | 1750 x 1750                               | 0.030    | 0.053    |
| <i>M. pralinia</i>    | A     | 12.2       | 300 x 300                                              | 300 x 300                                              | 1500 x 1500                               | 0.035    | 0.063    |
| <i>N. sammara</i>     | A     | 11.9       | 130 x 130                                              | 260 x 260                                              | 1050 x 1050                               | 0.027    | 0.033    |
|                       | C     | 10.4       | 130 x 130                                              | 260 x 260                                              | 1000 x 1000                               | 0.030    | 0.033    |
| <i>S. spiniferum</i>  | A     | 19.7       | 150 x 150                                              | 300 x 300                                              | 1370 x 1370                               | 0.028    | 0.034    |
| <i>S. diadema</i>     | C     | 10.8       | 150 x 150                                              | 300 x 300                                              | 1080 x 1080                               | 0.027    | 0.042    |
|                       | D     | 11.7       | 150 x 150                                              | 300 x 300                                              | 950 x 950                                 | 0.039    | 0.049    |
| <i>S. rubrum</i>      | B     | 14         | 150 x 150                                              | 300 x 300                                              | 1200 x 1200                               | 0.030    | 0.039    |
| <i>S. violaceum</i>   | A     | 15.6       | 200 x 200                                              | 400 x 400                                              | 1260 x 1260                               | 0.025    | 0.038    |

**Table S3.** Summary of holocentrid transcriptomes, opsin gene mapping, and proportional opsin gene expression. *RH1* = rod opsin, *SWS2* = short-wavelength sensitive, *RH2* = rhodopsin-like. \* Transcriptomes from Musilova et al. 2019.

| Holocentrinae                                   | RNA sequencing |              |                            | Mapping # filtered reads |              |                            |                  |                        | Proportional opsin gene expression % |                     |                                     |                    |                     |                     |                |
|-------------------------------------------------|----------------|--------------|----------------------------|--------------------------|--------------|----------------------------|------------------|------------------------|--------------------------------------|---------------------|-------------------------------------|--------------------|---------------------|---------------------|----------------|
|                                                 | Transcriptome  |              |                            | Rod                      | Single cones | Double cones (sub-mapping) |                  |                        | Rod vs Cone                          |                     | Cone opsin vs total cone expression |                    |                     |                     |                |
|                                                 | ID             | SRA Acc. No. | # raw (filter) reads       | <i>RH1</i>               | <i>SWS2A</i> | <i>RH2A-1</i>              | -2               | -3                     | R                                    | C                   | <i>SWS2A</i>                        | <i>RH2A-1</i>      | -2                  | -3                  |                |
| <i>Sargocentron spiniferum</i><br>Lizard Island | F2             | SAMN16670685 | 19,118,407<br>(14,126,874) | 2,260,377                | 1,748        | 14,764 (1,064)             | 17611<br>(1,712) | 496<br>(32)            | 98.5                                 | 1.5                 | 5.1                                 | 36                 | 57.9                | 1.1                 |                |
| <i>Sargocentron rubrum</i><br>Cairns Marine     | F37            | SAMN16670686 | 34,314,266<br>(23,032,335) | 2,179,239                | 4,996        | 41,880<br>(3,190)          | 46779<br>(4,742) | -                      | 95.9                                 | 4.1                 | 5.4                                 | 38.1               | 56.6                | -                   |                |
| <i>Sargocentron diadema</i><br>Cairns Marine    | F30            | SAMN16670687 | 18,791,321<br>(13,400,810) | 1,073,406                | 4,354        | 41,214<br>(1,528)          | 5866<br>(1970)   | -                      | 91.7                                 | 8.3                 | 4.5                                 | 41.2               | 54.3                | -                   |                |
| <i>Neoniphon sammara</i> *<br>Lizard Island     | F3             | SRX5060694   | 6,838,760<br>(6,264,679)   | 324,704                  | 834          | 8,250 (90)                 | 7,434<br>(70)    | -                      | 95.2                                 | 4.8                 | 5.1                                 | 53.4               | 41.5                | -                   |                |
|                                                 | F6             | SRX5060695   | 4,506,938<br>(4,001,509)   | 170,140                  | 422          | 4,240 (40)                 | 3,942<br>(52)    | -                      | 95.2                                 | 4.8                 | 4.9                                 | 41.3               | 53.7                | -                   |                |
|                                                 | F10            | SRX5060692   | 4,084,557<br>(3,464,740)   | 176,987                  | 760          | 6,825 (116)                | 5,866<br>(66)    | -                      | 93.0                                 | 7.0                 | 5.7                                 | 60.1               | 34.2                | -                   |                |
|                                                 |                |              |                            |                          |              |                            |                  |                        | <b>Mean<br/>s.e.m.</b>               | <b>94.9<br/>1.0</b> | <b>5.1<br/>0.2</b>                  | <b>5.1<br/>0.2</b> | <b>45.0<br/>3.9</b> | <b>49.7<br/>3.9</b> | <b>-<br/>-</b> |
| <b>Myripristinae</b>                            |                |              |                            | <i>RH1</i>               | <i>SWS2A</i> | <i>RH2B-1</i>              |                  | R                      | C                                    | <i>SWS2A</i>        | <i>RH2B-1</i>                       |                    |                     |                     |                |
| <i>Myripristis jacobus</i> *<br>Cape Verde      | 51             | SRS4076665   | 17,244,006<br>(10,058,945) | 912,891                  | 386          | 7,363                      |                  | 99.1                   | 0.9                                  | 4.9                 | 95.1                                |                    |                     |                     |                |
|                                                 | 53             | SRS4076643   | 32,578,163<br>(25,511,374) | 1,926,830                | 732          | 4,910                      |                  | 99.7                   | 0.3                                  | 12.8                | 87.2                                |                    |                     |                     |                |
| <i>Myripristis berndti</i> *<br>Lizard Island   | F7             | SRS4076646   | 8,753,048<br>(6,071,712)   | 377,066                  | 54           | 876                        |                  | 99.8                   | 0.3                                  | 5.7                 | 94.3                                |                    |                     |                     |                |
|                                                 | F8             | SRS4076637   | 6,812,942<br>(5,841,804)   | 541,184                  | 98           | 1,682                      |                  | 99.7                   | 0.3                                  | 5.4                 | 94.6                                |                    |                     |                     |                |
|                                                 | F11            | SRS4076678   | 5,848,153<br>(5,271,695)   | 336,736                  | 162          | 1,816                      |                  | 99.4                   | 0.6                                  | 8.1                 | 91.9                                |                    |                     |                     |                |
|                                                 | F12            | SRS4076668   | 4,810,822<br>(4,282,905)   | 362,974                  | 126          | 1,972                      |                  | 99.4                   | 0.6                                  | 5.9                 | 94.1                                |                    |                     |                     |                |
| <i>Myripristis murdjan</i><br>Lizard Island     | F31            | SAMN16670688 | 26042977<br>(19969212)     | 2,497,905                | 1,076        | 19,185                     |                  | 99.2                   | 0.8                                  | 5.2                 | 94.8                                |                    |                     |                     |                |
| <i>Myripristis violacea</i><br>Lizard Island    | F5             | SAMN16670689 | 18679367<br>(13576628)     | 1,835,739                | 825          | 11,467                     |                  | 99.3                   | 0.7                                  | 6.6                 | 93.4                                |                    |                     |                     |                |
|                                                 |                |              |                            |                          |              |                            |                  | <b>Mean<br/>s.e.m.</b> | <b>99.4<br/>0.1</b>                  | <b>0.6</b>          | <b>6.8</b>                          | <b>93.2</b>        | <b>0.9</b>          |                     |                |



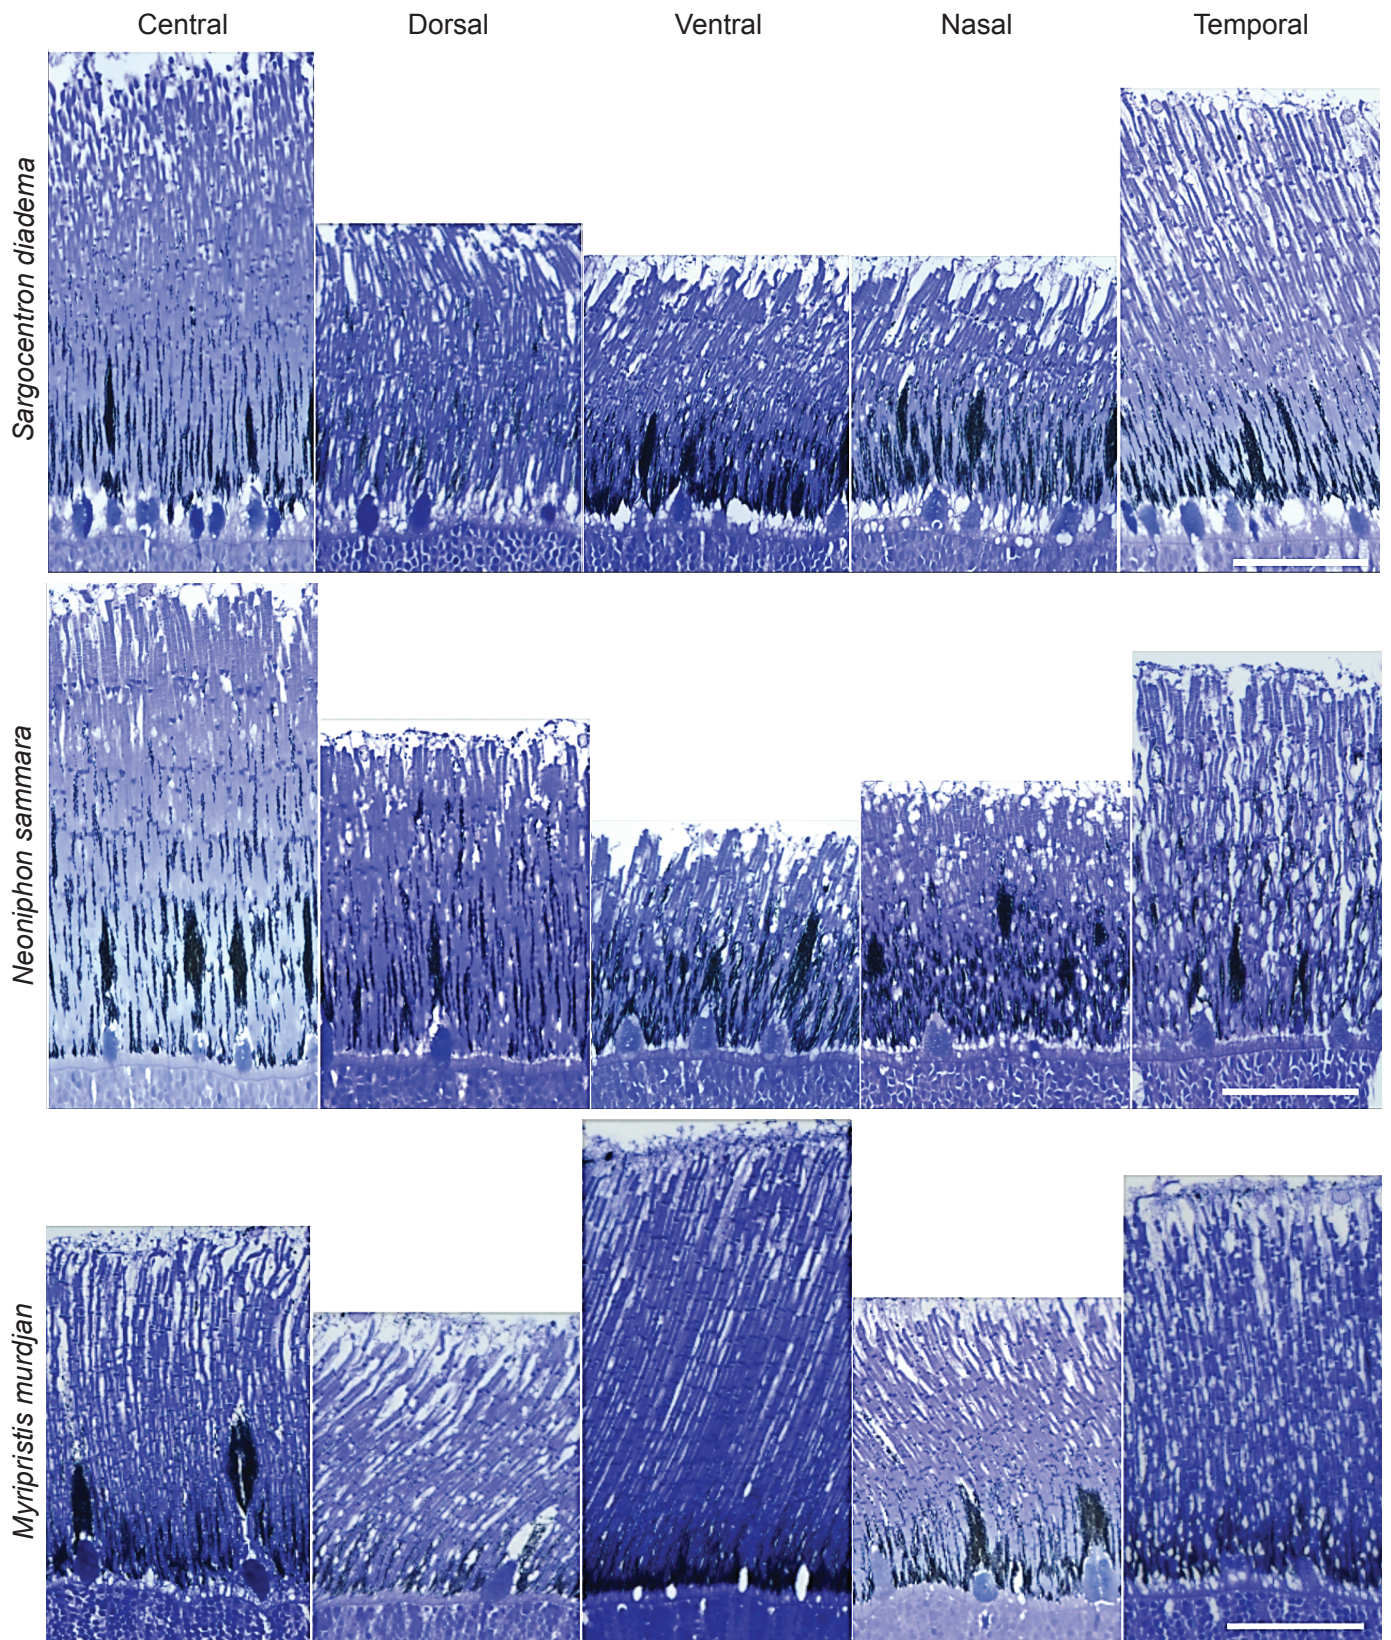

**Figure S1.** Variation in the number of banks and thickness of the photoreceptor layer across the retina of three species of Holocentridae. Scale bar = 50 μm.



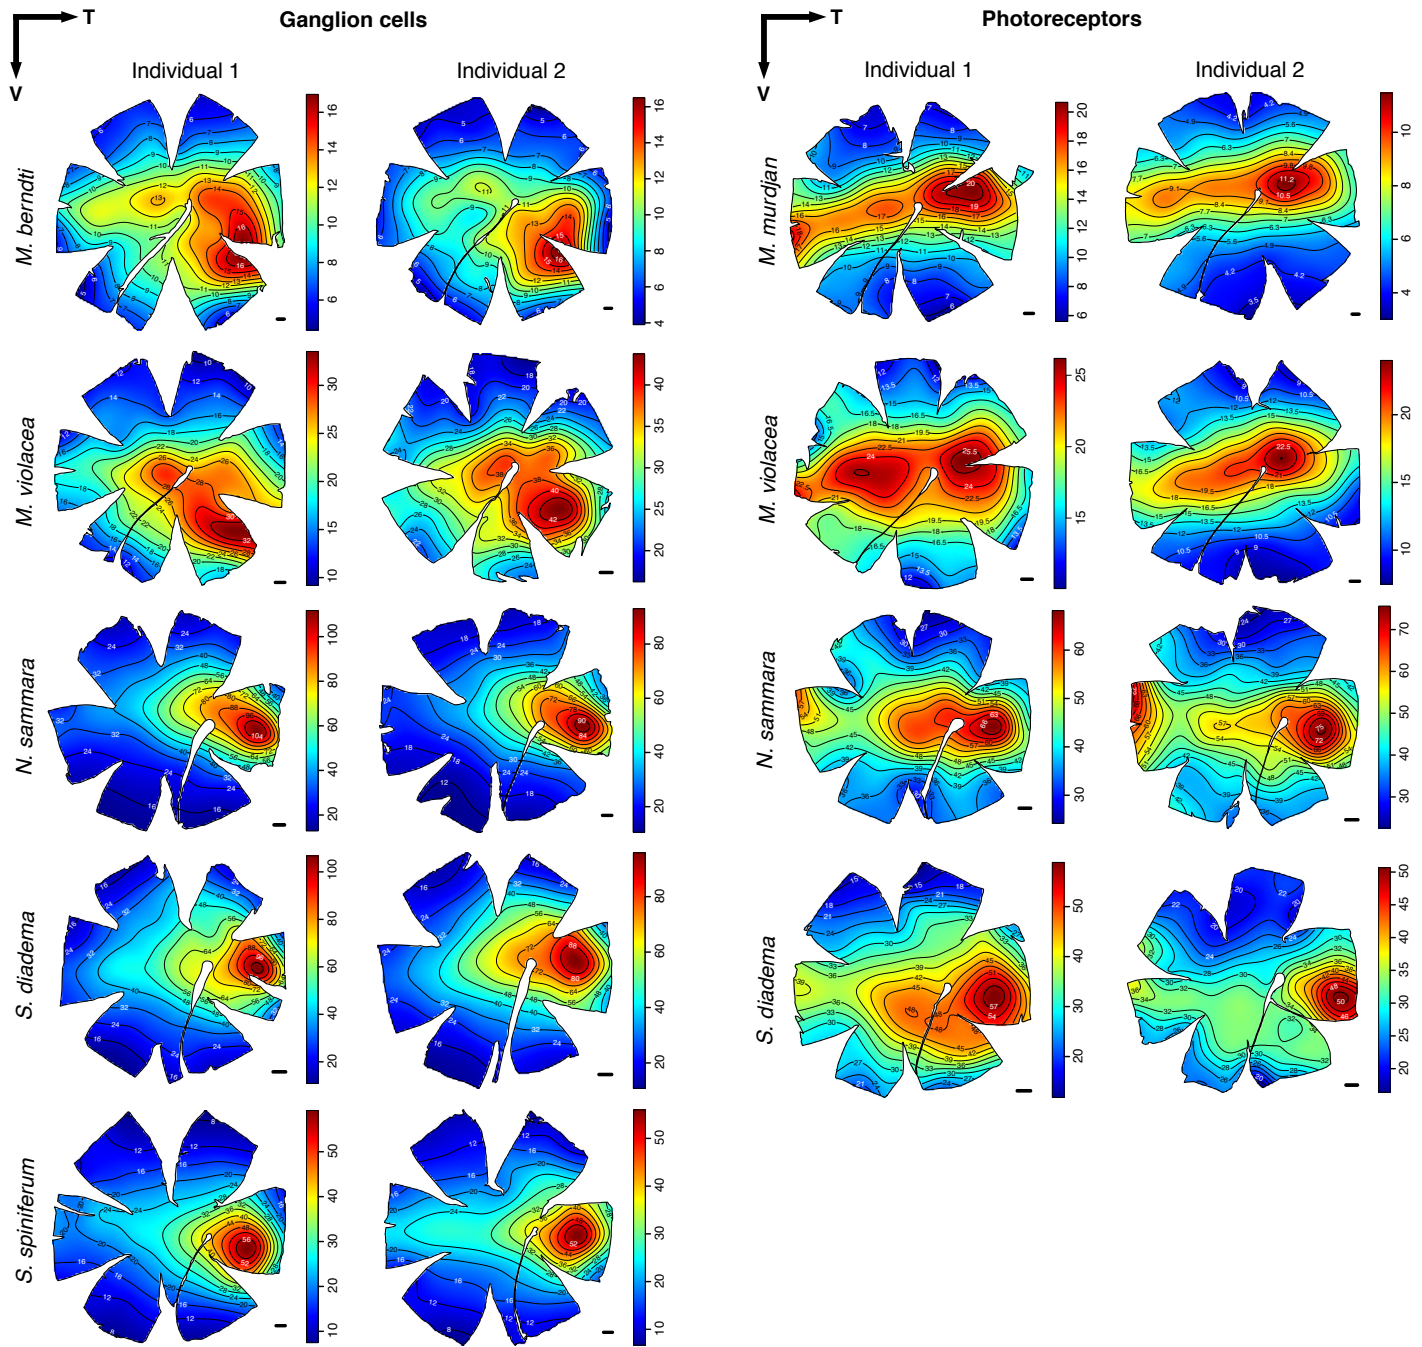

**Figure S2.** Intraspecific variability in the topographic distribution of ganglion cell and photoreceptor densities in the retinas of several species of Holocentridae. The black lines represent iso-density contours and values are expressed in densities  $\times 10^2$  cells/mm<sup>2</sup>. The black arrow indicates the orientation of the retinas. T = temporal, V = ventral. Scale bars = 1 mm.

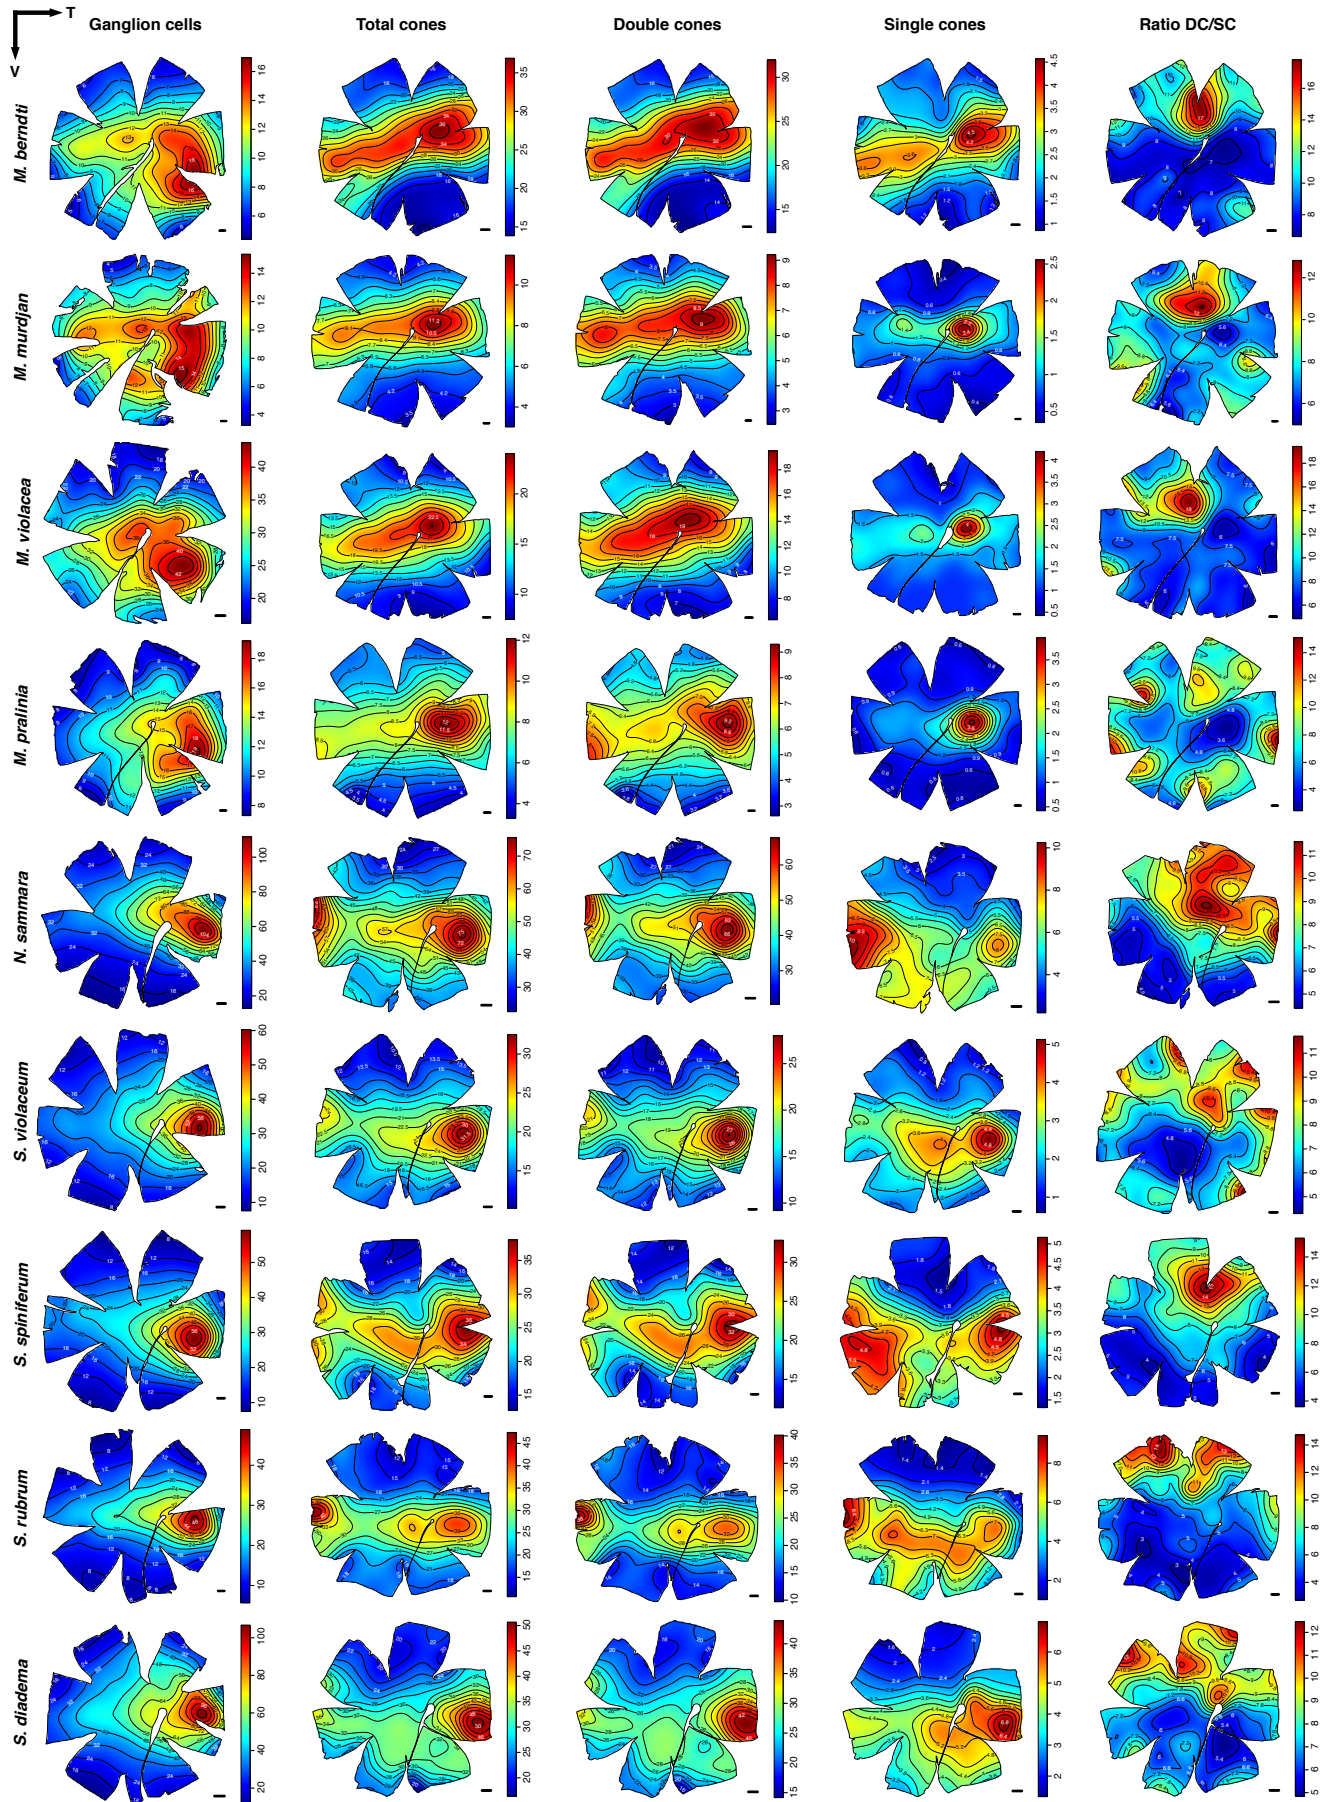

**Figure S3.** Topographic distribution of ganglion cell densities in the retinas of nine species of Holocentridae: The black lines represent iso-density contours and values are expressed in densities  $\times 10^2$  cells/mm<sup>2</sup>, except for ratio DC/SC. The black arrow indicates the orientation of the retinas. T = temporal, V = ventral. Scale bars = 1 mm.
